# Supplementary material for: Whose inflation expectations forecast best? Alternatives based on survey and financial data
Source: Research Square preprint supplement (doi:10.21203/rs.3.rs-7319211/v1), 2025-08-21
Supplement: Supplementary file 1 [file c17ab1e827ea71464cc05fb6.docx]

1. **Descriptive Tables**

**Number of Observations by Quarter and Source of Survey**

|  | Survey | | |
| --- | --- | --- | --- |
| Date | Business Sector | Financial Analysts | Trade Union |
| 2000Q2 | 823 | 26 | 17 |
| 2000Q3 | 674 | 23 | 10 |
| 2000Q4 | 579 | 21 | 14 |
| 2001Q1 | 555 | 15 | 9 |
| 2001Q2 | 487 | 21 | 13 |
| 2001Q3 | 483 | 19 | 16 |
| 2001Q4 | 459 | 20 | 13 |
| 2002Q1 | 436 | 15 | 15 |
| 2002Q2 | 441 | 19 | 11 |
| 2002Q3 | 393 | 16 | 9 |
| 2002Q4 | 428 | 16 | 12 |
| 2003Q1 | 368 | 15 | 12 |
| 2003Q2 | 694 | 25 | 28 |
| 2003Q3 | 538 | 20 | 27 |
| 2003Q4 | 532 | 17 | 26 |
| 2004Q1 | 483 | 17 | 28 |
| 2004Q2 | 456 | 18 | 24 |
| 2004Q3 | 411 | 18 | 19 |
| 2004Q4 | 426 | 17 | 19 |
| 2005Q1 | 421 | 16 | 18 |
| 2005Q2 | 484 | 18 | 18 |
| 2005Q3 | 425 | 15 | 16 |
| 2005Q4 | 358 | 15 | 11 |
| 2006Q1 | 369 | 13 | 15 |
| 2006Q2 | 324 | 11 | 12 |
| 2006Q4 | 322 | 14 | 10 |
| 2006Q4 | 328 | 22 | 13 |
| 2007Q1 | 309 | 16 | 34 |
| 2007Q2 | 318 | 17 | 24 |
| 2007Q3 | 415 | 23 | 22 |
| 2007Q4 | 365 | 19 | 21 |
| 2008Q1 | 364 | 19 | 25 |
| 2008Q2 | 385 | 23 | 25 |
| 2008Q3 | 333 | 20 | 20 |
| 2008Q4 | 336 | 19 | 19 |
| 2009Q1 | 349 | 19 | 15 |
| 2009Q2 | 345 | 19 | 19 |
| 2009Q3 | 362 | 20 | 14 |
| 2009Q4 | 322 | 20 | 13 |
| 2010Q1 | 397 | 19 | 12 |
| 2010Q2 | 371 | 15 | 12 |
| 2010Q3 | 376 | 30 | 9 |
| 2010Q4 | 355 | 15 | 11 |
| 2011Q4 | 438 | 19 | 16 |
| 2011Q4 | 394 | 18 | 13 |
| 2011Q4 | 378 | 15 | 11 |
| 2011Q4 | 388 | 17 | 12 |
| 2012Q1 | 391 | 17 | 11 |
| 2012Q2 | 350 | 17 | 13 |
| 2012Q3 | 380 | 17 | 13 |
| 2012Q4 | 334 | 17 | 14 |
| 2013Q1 | 242 | 17 | 16 |
| 2013Q2 | 339 | 13 | 10 |
| 2013Q3 | 249 | 13 | 11 |
| 2013Q4 | 309 | 10 | 11 |
| 2014Q1 | 265 | 16 | 15 |
| 2014Q2 | 286 | 15 | 10 |
| 2014Q3 | 254 | 15 | 10 |
| 2014Q4 | 206 | 12 | 8 |
| 2015Q1 | 202 | 17 | 16 |
| 2015Q2 | 213 | 13 | 17 |
| 2015Q3 | 363 | 19 | 13 |
| 2015Q4 | 258 | 15 | 12 |
| 2016Q1 | 223 | 19 | 15 |
| 2016Q2 | 200 | 14 | 9 |
| 2016Q3 | 211 | 15 | 19 |
| 2016Q4 | 168 | 14 | 11 |
| 2017Q1 | 177 | 14 | 13 |
| 2017Q2 | 172 | 15 | 10 |
| 2017Q3 | 151 | 11 | 12 |
| 2017Q4 | 172 | 13 | 12 |
| 2018Q1 | 159 | 17 | 12 |
| 2018Q2 | 132 | 12 | 13 |
| 2018Q3 | 131 | 15 | 10 |
| 2018Q4 | 148 | 17 | 9 |
| 2019Q1 | 130 | 19 | 13 |
| 2019Q2 | 139 | 17 | 9 |
| 2019Q3 | 123 | 15 | 13 |
| 2019Q4 | 141 | 18 | 12 |
| 2020Q1 | 131 | 14 | 9 |
| 2020Q2 | 89 | 15 | 9 |
| 2020Q3 | 82 | 18 | 12 |
| 2020Q4 | 117 | 14 | 12 |
| 2021Q1 | 97 | 16 | 11 |
| 2021Q2 | 161 | 18 | 10 |
| 2021Q3 | 120 | 12 | 13 |
| 2021Q4 | 112 | 14 | 13 |
| 2022Q1 | 110 | 18 | 12 |
| 2022Q2 | 142 | 19 | 11 |
| 2022Q3 | 98 | 13 | 15 |
| 2022Q4 | 288 | 14 | 10 |
| 2023Q1 | 141 | 18 | 10 |
| 2023Q2 | 117 | 17 | 10 |
| 2023Q3 | 270 | 28 | 10 |
| 2023Q4 | 134 | 16 | 10 |
| *TOTAL* | *30261* | *1651* | *1423* |

Note; The number of observations refer to the CPIT0 series (current calendar year forecast for CPI inflation). Normally, respondents provide forecasts for all horizons (T0, T1, T2, and 5 years ahead) although occasionally some respondents fail to do so. Accordingly, cumulative sum of each column may not add up to TOTAL which provides the potential number of available observations. Data for the 5 years ahead average inflation forecasts begin in 2011Q3.

Source: authors’ calculations from data provided by the BER.

**Observations by Firm Size**

| Code | Name | # Employees | Business | Financial Analysts | Trade Union |
| --- | --- | --- | --- | --- | --- |
| 1 | Micro | E< 21 | 8440 | 691 | 687 |
| 2 | Small | 21<E <50 | 5991 | 109 | 109 |
| 3 | Medium | 51< E<200 | 8696 | 295 | 292 |
| 4 | Large | E > 200 | 6844 | 292 | 280 |

Note: Raw data available at a higher level of disaggregation but we adopted the aggregation used by the BER. Not all respondents respond by providing firm size data so the sum of each column may not add up to TOTAL shown in the preceding table. The code is the one used by the BER.

Source: same as previous Table.

**Position of Survey Respondents: Business and Financial Analysts Surveys**

| Code | Title | Business | Financial Analysts |
| --- | --- | --- | --- |
| 0 | CEO | 18435 | 29 |
| 1 | Financial Manager/Accountant | 8422 | 18 |
| 2 | Senior Sales/Production Manager | 898 | 0 |
| 3 or 7 | Other | 384 | 2 |
| 4 | Economist | 24 | 1420 |
| 5 | Investment Analyst | 0 | 60 |
| 6 | Fund Manager | 0 | 80 |
| 8 | Trade Union | 5 | 0 |
| 9 | Employer Organization | 1 | 0 |

Note: See notes to preceding tables. Trade Union survey does not contain the foregoing information. The code is the one used by the BER.

Source: same as first Table.

**SIC Classification – Business Survey Only**

| Sector name | SIC code (2-digit) | Mnemonic | Observations |
| --- | --- | --- | --- |
| Agriculture | 11 | AGR | 2489 |
| Mining | 13 | MIN | 559 |
| Manufacturing | 30-39 | MFG | 11196 |
| Electricity & Water | 42 | ELE | 13 |
| Construction | 5 | CON | 1423 |
| Wholesale & Retail | 61-64 | RET | 9792 |
| Transportation & Communication | 71-75 | TRA | 518 |
| Finance & Real Estate | 82-88 | FIN | 2933 |
| Community & Social Services | 91-99 | COM | 1256 |

Note: see notes to preceding tables.

Source: Same as first Table.

**Sector Classification – Financial Analysts Only**

| Name | Sector Code | Observations |
| --- | --- | --- |
| Banks | 200 | 471 |
| Advisers/Brokers | 210 | 859 |
| Insurers | 220 | 138 |
| Other | 230 | 182 |

Note: See notes to preceding tables. LABOUR is classified as belonging to sector 300.

1. **Econometric and Other Statistical Results: Unless Otherwise noted the FULL sample is used (2000Q2-2023Q4; 2011Q3-2023Q4 for 5 years ahead forecasts)**

Persistence: Business Sector, No structural breaks permitted

| Variable | AR(1) -Full | AR(1)-Q75 | AR(1)-Q25 |
| --- | --- | --- | --- |
| CPI inflation | 0.89 (.05) | 0.88 (.05) | |
| CPIT0 | 0.92 (.04) | 0.90 (.05) | 0.92 (.04) |
| CPIT1 | 0.90 (.04) | 0.87 (.05) | 0.88 (.05) |
| CPIT2 | 0.88 (.04) | 0.86 (.05) | 0.85 (.05) |
| CPI5a | 0.90 (.06) | 0.93 (.06) | 0.83 (.08) |
| SARB forecasts  T0  T1  T2 | 0.87 (.05)  0.68 (.08)  0.69 (.06) |  |  |
| Market forecasts | 0.89 (.07) |  |  |

Note: Estimates via OLS. Heteroskedastic consistent standard errors in parenthesis. Unless otherwise noted all coefficients are statistically significant at the 1% level. Market forecasts are from Bloomberg for the 5 year ahead horizon. CPI inflation is the annualized quarterly CPI headline inflation rate (i.e., 100*logPt ). Q75 is the right tail of the inflation forecast distribution (75th percentile and above) while Q25 is the left-tail of the same distribution (25th percentile and below).

Persistence: Business Sector, Allowing for structural breaks

| Variable | Break dates  (MAX = 2) | AR(1) estimates |
| --- | --- | --- |
| CPI inflation | 2003Q1, 2005Q2 | 1.26 (.18) T=10,  0.72 (.08) T=9,  0.89 (.07) T=75 |
| CPIT0 | 2005Q3, 2008Q4 | 0.99 (.11) T=20,  1.18 (.03) T=13,  0.88 (.04) T=61 |
| CPIT1 | 2008Q1, 2010Q2 | 0.87 (.08) T=30,  0.26 (.06) T=9,  0.88 (.07) T=55 |
| CPIT2 | 2008Q1, 2010Q2 | 0.83 (.08) T=30,  *0.11 (.09) T=9,*  0.86 (.06) T=55 |
| CPI5a | 2018Q1, 2019Q2 | 0.64 (.10) T=25,  -0.42 (.06) T=5,  0.76 (.08) T=19 |
| SARB forecasts  T0  T1  T2 | 2004Q3  2016Q3  2006Q1,  2008Q4 | 0.13 (.13) T=11, 0.93 (.04) T=78  0.44 (.11) T=63, 0.66(.06) T=30  0.89 (.11) T=21, 1.37 (.04) T=11, 0.73 (.07) T=61 |

| Variable | Break dates  (MAX = 1) | AR(1) estimates |
| --- | --- | --- |
| CPI inflation | None | Same as no break |
| CPIT0 | None | Same as no break |
| CPIT1 | 2002Q4 | *0.34 (.16) T=9*,  0.92 (.04) T=75, |
| CPIT2 | 2002Q4 | 0.26 (.08) T=9,  0.91 (.04) T=75, |
| CPI5a | 2018Q1 | 0.65 (.09) T=25,  0.57 (.14) T=24 |

Notes to persistence table: Estimated via OLS. T is the number of observations. Break test relies on the Bai-Perron structural break test. The Global test of M=2 or 1 against zero breaks is employed. Sample is trimmed by 10%, and a 5% significance level is used to detect a statistically significant structural break. Standard errors (Newey-West) are in parenthesis. The sample is 2000Q3-2023Q4 except for CPI5a which begins 2011Q4. SARB forecasts begin 2000Q4 and end 2023Q4. Market forecasts (Bloomberg 5 years ahead implied inflation forecast) begin 2012Q3. CPIT0, CPIT1, CPIT2, and CPI5a are for the Business Sector Survey. See below for the comparable results for the Financial Analysts and Trade Union portions of the survey. Estimates in *italics* are not statistically significant. The remaining are statistically significant at least at the 1% level.

Persistence – Financial Analysts and Trade Unions

| Variable | AR(1) -Full | AR(1)-Q75 | AR(1)-Q25 |
| --- | --- | --- | --- |
| Financial Analysts | | | |
| CPIT0 | 0.92 (.04) | 0.88 (.05) | 0.90 (.05) |
| CPIT1 | 0.88 (.05) | 0.84 (.08) | 0.87 (.05) |
| CPIT2 | 0.83 (.06) | 0.78 (.06) | 0.87 (.05) |
| CPI5a | 0.87 (.07) | 0.80 (.06) | 0.80 (.09) |
| Trade Union | | | |
| CPIT0 | 0.92 (.04) | 0.90 (.05) | 0.88 (.05) |
| CPIT1 | 0.88 (.05) | 0.87 (.05) | 0.84 (.06) |
| CPIT2 | 0.83 (.06) | 0.78(.06) | 0.87 (.05) |
| CPI5a | 0.87 (.07) | 0.80 (.09) | 0.80 (.09) |

| Variable | Break dates  (MAX = 1) | AR(1) estimates |
| --- | --- | --- |
| Financial Analysts | | |
| CPIT0 | None | Same as no break |
| CPIT1 | None | Same as no break |
| CPIT2 | 2003Q1 | -0.39 (.14) T=10,  0.86 (.07) T=84, |
| CPI5a | 2016Q4 | -0.08 (.15) T=20,  0.76 (.08) T=29 |
| Trade Union | | |
| CPIT0 | No break | Same as no break |
| CPIT1 | No break | Same as no break |
| CPIT2 | 2003Q1 | *-0.39 (.27)* T=10, 0.86 (.07) T=84 |
| CPI5a | 2016Q4 | *-0.08 (.15)* T=24, 0.76 (.08) T=29 |

Note: See notes to preceding tables. The case of 1 break only is shown. The case for 2 breaks has been estimated and results are available on request.

Unconditional Correlations Between Forecast Errors

T0 Horizon

| Source | BUS | FIN | LAB |
| --- | --- | --- | --- |
| BUS – Full  BUS – “Calm”  BUS – “Volatile” |  |  |  |
| FIN - Full  FIN – “Calm”  FIN – “Volatile” | 0.864  0.830  0.873 |  |  |
| LAB – Full  LAB- “Calm”  LAB – “Volatile’ | 0.985  0.966  0.988 | 0.846  0.816  0.856 |  |
| SARB – Full  SARB – “Calm”  SARB – “Volatile” | 0.815  0.748  0.844 | 0.792  0.635  0.823 | 0.812  0.839  0.829 |

T1 Horizon

| Source | BUS | FIN | LAB |
| --- | --- | --- | --- |
| BUS – Full  BUS – “Calm”  BUS – “Volatile” |  |  |  |
| FIN - Full  FIN – “Calm”  FIN – “Volatile” | 0.878  0.838  0.886 |  |  |
| LAB – Full  LAB- “Calm”  LAB – “Volatile’ | 0.978  0.972  0.978 | 0.833  0.809  0.978 |  |
| SARB – Full  SARB – “Calm”  SARB – “Volatile” | 0.893  0.773  0.906 | 0.969  0.921  0.973 | 0.859  0.767  0.871 |

Note: Unless otherwise noted all unconditional correlations are statistically significant at the 1% level. “Calm” refers to the 2009Q4-2010Q4 period; “Volatile” refers to the 2000Q2-2009Q3 & 2020Q1-2023Q4 period.

T2 Horizon

| Source | BUS | FIN | LAB |
| --- | --- | --- | --- |
| BUS – Full  BUS – “Calm”  BUS – “Volatile” |  |  |  |
| FIN - Full  FIN – “Calm”  FIN – “Volatile” | 0.948  0.922  0.955 |  |  |
| LAB – Full  LAB- “Calm”  LAB – “Volatile’ | 0.972  0.965  0.973 | 0.900  0.886  0.907 |  |
| SARB – Full  SARB – “Calm”  SARB – “Volatile” | 0.924  0.861  0.932 | 0.983  0.959  0.985 | 0.877  0.827  0.885 |

5 years ahead Horizon

| Source | BUS | FIN | LAB |
| --- | --- | --- | --- |
| BUS – Full  BUS – “Calm”  BUS – “Volatile” |  |  |  |
| FIN - Full  FIN – “Calm”  FIN – “Volatile” | 0.787  0.734  0.870 |  |  |
| LAB – Full  LAB- “Calm”  LAB – “Volatile’ | 0.822  0.813  0.923 | 0.679  0.675  0.839 |  |
| SARB – Full  SARB – “Calm”  SARB – “Volatile” | 0.743  0.798  0.835 | 0.740  0.806  0.917 | 0.782  0.728  0.833 |

Note: see note to the previous Table.

Mean Absolute Scaled Errors – Business Sector – Full Sample

| Type | CPIT0 | CPIT1 | CPIT2 | CPI5a |
| --- | --- | --- | --- | --- |
| Firm Size | | | | |
| Micro | 0.595 | 0.526 | 0.550 | 0.917 |
| Small | 0.626 | 0.531 | 0.552 | 0.936 |
| Medium | 0.615 | 0.490 | 0.516 | 0.892 |
| Large | 0.623 | 0.463 | 0.471 | 0.827 |
| Sector (SIC) | | | | |
| Manufacturing | 0.619 | 0.477 | 0.497 | 0.868 |
| Retail | 0.627 | 0.551 | 0.580 | 0.959 |
| Finance | 0.627 | 0.484 | 0.493 | 0.924 |
| Position | | | | |
| CEO | 0.611 | 0.511 | 0.530 | 0.894 |
| Financial Mgr | 0.628 | 0.486 | 0.497 | 0.863 |
| Entire Business Sector Survey | | | | |
| ALL | 0.618 | 0.594 | 0.529 | 0.915 |

Mean Absolute Scaled Errors – Business Sector – “Calm” Sub-Sample

| Type | CPIT0 | CPIT1 | CPIT2 | CPI5a |
| --- | --- | --- | --- | --- |
| Firm Size | | | | |
| Micro | 0.843 | 0.987 | 0.962 | 0.880 |
| Small | 0.877 | 0.983 | 0.970 | 0.896 |
| Medium | 0.848 | 0.969 | 0.975 | 0.840 |
| Large | 0.817 | 0.930 | 0.938 | 0.722 |
| Sector (SIC) | | | | |
| Manufacturing | 0.843 | 0.956 | 0.966 | 0.798 |
| Retail | 0.868 | 0.993 | 0.978 | 0.928 |
| Finance | 0.868 | 0.966 | 0.958 | 0.876 |
| Position | | | | |
| CEO | 0.843 | 0.977 | 0.959 | 0.849 |
| Financial Mgr | 0.849 | 0.948 | 0.971 | 0.783 |
| Entire Business Sector Survey | | | | |
| ALL | 0.847 | 0.974 | 0.980 | 0.862 |

Mean Absolute Scaled Errors – Business Sector – “Volatile” Sub-Sample

| Type | CPIT0 | CPIT1 | CPIT2 | CPI5a |
| --- | --- | --- | --- | --- |
| Firm Size | | | | |
| Micro | 0.492 | 0.372 | 0.387 | 0.976 |
| Small | 0.526 | 0.379 | 0.382 | 1 |
| Medium | 0.522 | 0.331 | 0.317 | 1 |
| Large | 0.547 | 0.307 | 0.274 | 1 |
| Sector (SIC) | | | | |
| Manufacturing | 0.530 | 0.319 | 0.300 | 1 |
| Retail | 0.526 | 0.397 | 0.411 | 1 |
| Finance | 0.526 | 0.323 | 0.315 | 1 |
| Position | | | | |
| CEO | 0.518 | 0.357 | 0.356 | 0.975 |
| Financial Mgr | 0.538 | 0.326 | 0.295 | 1 |
| Entire Business Sector Survey | | | | |
| ALL | 0.525 | 0.346 | 0.346 | 1 |

Mean Absolute Scaled Errors – Financial Analysts– Full Sample

| Type | CPIT0 | CPIT1 | CPIT2 | CPI5a |
| --- | --- | --- | --- | --- |
| Firm Size | | | | |
| Micro & Small & Large | 0.301 | 0.068 | 0.051 | 0.370 |
| Medium | 0.272 | 0.024 | 0.004 | 0.702 |
| Position | | | | |
| Economists | 0.299 | 0.034 | 0.013 | 0.661 |
| All except Econ | 0.491 | 0.407 | 0.421 | 0.383 |
| Sector | | | | |
| Banks and Brokers | 0.320 | 0.054 | 0.015 | 0.735 |
| Insurance & Others | 0.290 | 0.069 | 0.047 | 0.463 |
| Entire Financial Analysts Survey | | | | |
| ALL | 0.305 | 0.062 | 0.035 | 0.658 |

Mean Absolute Scaled Errors – Financial Analysts– “Calm” Sub-Sample

| Type | CPIT0 | CPIT1 | CPIT2 | CPI5a |
| --- | --- | --- | --- | --- |
| Firm Size | | | | |
| Micro & Small & Large | 0.547 | 0.534 | 0.521 | 0.817 |
| Medium | 0.411 | 0.468 | 0.438 | 0.695 |
| Position | | | | |
| Economists | 0.532 | 0.554 | 0.527 | 0.802 |
| All except Econ | 0.491 | 0.407 | 0.421 | 0.383 |
| Sector | | | | |
| Banks and Brokers | 0.553 | 0.555 | 0.548 | 0.136 |
| Insurance & Others | 0.490 | 0.555 | 0.496 | 0.113 |
| Entire Financial Analysts Survey | | | | |
| ALL | 0.533 | 0.548 | 0.520 | 0.119 |

Mean Absolute Scaled Errors – Financial Analysts– “Volatile” Sub-Sample

| Type | CPIT0 | CPIT1 | CPIT2 | CPI5a |
| --- | --- | --- | --- | --- |
| Firm Size | | | | |
| Micro & Small & Large | 0.248 | 0.058 | 0.101 | 0.536 |
| Medium | 0.240 | 0.097 | 0.143 | 0.737 |
| Position | | | | |
| Economists | 0.243 | 0.112 | 0.154 | 0.155 |
| All except Econ | 0.491 | 0.407 | 0.421 | 0.383 |
| Sector | | | | |
| Banks and Brokers | 0.271 | 0.078 | 0.136 | 0.094 |
| Insurance & Others | 0.242 | 0.074 | 0.113 | 0.176 |
| Entire Financial Analysts Survey | | | | |
| ALL | 0.255 | 0.072 | 0.119 | 0.098 |

Mean Absolute Scaled Errors – Trade Union– Full Sample

| Type | CPIT0 | CPIT1 | CPIT2 | CPI5a |
| --- | --- | --- | --- | --- |
| Firm Size | | | | |
| Small, Medium & Large | 0.500 | 0.436 | 0.461 | 0.446 |
| Micro | 0.522 | 0.369 | 0.370 | 0.028 |
| Sector | | | | |
| Trade Union | 0.469 | 0.409 | 0.420 | 0.324 |
| Other than Trade Union | 0.491 | 0.407 | 0.421 | 0.383 |
| Entire Trade Union Survey | | | | |
| ALL | 0.491 | 0.403 | 0.426 | 0.392 |

Mean Absolute Scaled Errors – Trade Union– “Calm” Sub-Sample

| Type | CPIT0 | CPIT1 | CPIT2 | CPI5a |
| --- | --- | --- | --- | --- |
| Firm Size | | | | |
| Small, Medium & Large | 0.737 | 0.867 | 0.911 | 0.444 |
| Micro | 0.829 | 0.884 | 0.919 | 0.028 |
| Sector | | | | |
| Trade Union | 0.764 | 0.879 | 0.916 | 0.280 |
| Other than Trade Union | 0.760 | 0.882 | 0.917 | 0.359 |
| Entire Trade Union Survey | | | | |
| ALL | 0.760 | 0.882 | 0.948 | 0.373 |

Mean Absolute Scaled Errors – Financial Analysts– “Volatile” Sub-Sample

| Type | CPIT0 | CPIT1 | CPIT2 | CPI5a |
| --- | --- | --- | --- | --- |
| Firm Size | | | | |
| Small, Medium & Large | 0.420 | 0.309 | 0.320 | 0.451 |
| Micro | 0.389 | 0.185 | 0.182 | INS |
| Sector | | | | |
| Trade Union | 0.357 | 0.260 | 0.265 | INS |
| Other than Trade Union | 0.394 | 0.262 | 0.266 |  |
| Entire Trade Union Survey | | | | |
| ALL | 0.394 | 0.256 | 0.269 | 0.428 |

Mean Absolute Scaled Errors – Selected Comparisons for Aggregates – Full Sample

| Type | CPIT0 | CPIT1 | CPIT2 | CPI5a |
| --- | --- | --- | --- | --- |
| BER | 0.515 | 0.298 | 0.297 | 0.451 |
| SARB | 0.770 | 0.136 | 0.039 | 0.315 |
| BUS | 0.618 | 0.633 | 0.583 | 0.990 |
| FIN | 0.324 | 0.026 | 0.076 | 0.743 |
| LAB | 0.494 | 0.512 | 0.491 | 0.339 |
| Factor Model | 0.003/0.088* | 0.003/0.070* | 0.016/0.057* | 0.423/0.290* |
| Bloomberg | NA | NA | NA | 0.315 |

*Post-GFC sample only (i.e., post 2009Q3 period)

Mean Absolute Scaled Errors – Aggregates and Selected Comparisons– “Calm” Sub-Sample

| Type | CPIT0 | CPIT1 | CPIT2 | CPI5a |
| --- | --- | --- | --- | --- |
| BER | 0.847 | 0.796 | 0.763 | 0.287 |
| SARB | 0.808 | 0.460 | 0.181 | NA |
| BUS | 0.847 | 0.918 | 0.916 | 0.984 |
| FIN | 0.533 | 0.432 | 0.314 | 0.872 |
| LAB | 0.760 | 0.832 | 0.826 | 0.364 |
| Factor Model | 0.072 | 0.164 | 0.246 | 0.154 |
| Bloomberg | NA | NA | NA | 0.491 |

Mean Absolute Scaled Errors – Aggregates and Selected Comparisons– “Volatile” Sub-Sample

| Type | CPIT0 | CPIT1 | CPIT2 | CPI5a |
| --- | --- | --- | --- | --- |
| BER | 0.411 | 0.248 | 0.161 | 0.732 |
| SARB | 0.762 | 0.004 | 0.131 | NA |
| BUS | 0.525 | 0.505 | 0.437 | 1 |
| FIN | 0.258 | 0.059 | 0.176 | 0.330 |
| LAB | 0.394 | 0.384 | 0.350 | 0.299 |
| Factor Model | 0.072 | 0.164 | 0.246 | 0.154 |
| Bloomberg | NA | NA | NA | 0.100 |

Mean Absolute Scaled Errors – Aggregates and Selected Comparisons
– Recessions vs Expansions

| Type | CPIT0 | CPIT1 | CPIT2 | CPI5a |
| --- | --- | --- | --- | --- |
| BER – R  BER – E | 0.277  0.639 | 0.527  0.033 | 0.728  0.271 | 0.761 |
| SARB – R  SARB - E | 0.601  0.849 | 0.390  0.096 | 0.622  0.524 | NA  NA |
| BUS – R  BUS - E | 0.410  0.749 | 0.720  0.274 | 0.918  0.089 | 1  0.851 |
| FIN – R  FIN - E | 0.105  0.439 | 0.307  0.148 | 0.641  0.477 | 0.471  0.676 |
| LAB – R  LAB - E | 0.235  0.650 | 0.641  0.117 | 0.874  0.056 | 0.584  0.287 |
| Factor Model – R  Factor model - E | 0.393  0.297 | 0.393  0.282 | 0.362  0.279 | 0.040  0.697 |
| Bloomberg – R  Bloomberg - E | NA | NA | NA | 0.525  0.155 |

Mean Absolute Scaled Errors – Aggregates and Selected Comparisons–
Rising (R) or Falling (F) Inflation

| Type | CPIT0 | CPIT1 | CPIT2 | CPI5a |
| --- | --- | --- | --- | --- |
| Firm Size | | | | |
| BER – R  BER – F | 0.577  0.440 | 0.530  0.240 | 0.463  0.176 | 0.635  0.300 |
| SARB - R  SARB – F | 0.857  0.633 | 0.304  0.130 | 0.157  0.258 | INS |
| BUS - R  BUS – F | 0.651  0.575 | 0.688  0.561 | 0.655  0.493 | 0.982 |
| FIN - R  FIN – F | 0.477  0.182 | 0.554  0.456 | 0.242  0.287 | 0.585  0.853 |
| LAB - R  LAB – F | 0.518  0.463 | 0.554  0.456 | 0.563  0.397 | 0.475  0.212 |
| Bloomberg - R  Bloomberg - F | INS | INS | INS | 0.485  0.153 |
| Factor model – R  Factor Model - F | 0.166  0.179 | 0.182  0.206 | 0.186  0.181 | 0.281  0.545 |

Note: Mean Absolute Scaled Errors (MASE) is mean() where . T is the number of observations, xt is the series and et is the forecast error (i.e., (xt – *f*t), where xt is the observed and *f*t is the forecasted value. MASE is also interpreted as the ratio of Mean Absolute Errors (MAE) of the chosen forecasts over the MAE of the naïve alternative (i.e., the random walk). BER is the simple arithmetic average of the Business, Financial Analysts and Trade Union surveys. Bloomberg is the Asset-Backed Securities 5 year return (SAGGBE05 Index). The “best performing micro forecasts” refers to the lowest MASE score obtained from disaggregated forecast groups in the foregoing Tables. FA Medium are financial analysts in medium-sized firms (51 to 199 employees), Mi&S&L are the group of micro, small, and large firms in the financial analysts group. Factor Model estimates are explained separately. “Calm” period is 2009Q4-2019Q4; “Volatile” period is 2000Q2-2009Q3 & 2020Q1-2023Q4. Full sample is 2000Q2-2023Q4 before any transformations or lags. INS means that there are either no data for the horizon in question (e.g., Bloomberg) or an insufficient number of observations (T=12 for the 2020Q1-2023Q4 sample; data for CPI5a begin in 2011Q3). Recessions for the 2013-2024 period are from J.C. Venter and A. Wolhuter (2023), SARB Quarterly Bulletin, March, pp. 107-1209. Recessions for the period 2000-2012 are from OECD. Estimates based on a factor model are for the benchmark model only (see Table below). Results for the extended model are virtually identical with the ones from the benchmark model. Rising inflation means the change in CPI inflation is positive while falling inflation is when the change in CPI inflation is zero or negative.

Selected Root Mean Squared Errors: Aggregate Results– Full Sample

| Horizon | SARB | BER | Business | FIN ANAL | LABOUR | *Consensus* |
| --- | --- | --- | --- | --- | --- | --- |
| T0 | 1.625 | 1.766 | 2.085 | 1.449 | 1.955 | *1.602* |
| T1 | 2.466 | 2.033 | 2.210 | 2.162 | 2.063 | *2.630* |
| T2 | 2.539 | 2.214 | 2.362 | 2.426 | 2.184 | NA |
| 5a | 0.917 | 0.411 | 0.688 | 0.414 | 0.541 | NA |

Selected Root Mean Squared Errors: Aggregate Results– “Calm” Sub-Sample

| Horizon | SARB | BER | Business | FIN ANAL | LABOUR |
| --- | --- | --- | --- | --- | --- |
| T0 | 0.883 | 0.959 | 1.291 | 0.555 | 1.162 |
| T1 | 1.018 | 1.117 | 1.447 | 0.854 | 1.269 |
| T2 | 0.987 | 1.233 | 1.562 | 0.967 | 1.355 |
| 5a | 0.893 | 0.827 | 1.112 | 0.720 | 0.868 |

Selected Root Mean Squared Errors: Aggregate Results– “Volatile” Sub-Sample

| Horizon | SARB | BER | Business | FIN ANAL | LABOUR |
| --- | --- | --- | --- | --- | --- |
| T0 | 2.020 | 2.196 | 2.526 | 1.860 | 2.387 |
| T1 | 3.160 | 2.253 | 2.646 | 2.769 | 2.503 |
| T2 | 3.293 | 2.741 | 2.821 | 3.106 | 2.645 |
| 5a | 0.890 | 1.389 | 1.397 | 1.614 | 1.246 |

Note: The 5 year ahead sample begins in 2011Q3 while the others begin in 2000Q2. Boomberg data are from 2012 on. BER is the arithmetic average of Business, FIN ANAL (Financial Analysts) and LABOUR (Trade unions).

Correlation Matrix of RMSE– Full Sample

| Probability | BUST0 | BUST1 | BUDT2 | BUS5A | FINT0 | FINT1 | FINT2 | FIN5A | LABT0 | LABT1 | LABT2 | LAB5A |
| --- | --- | --- | --- | --- | --- | --- | --- | --- | --- | --- | --- | --- |
| BUS T1 | **0.94** | 1.00 |  |  |  |  |  |  |  |  |  |  |
|  | 18.67 | ----- |  |  |  |  |  |  |  |  |  |  |
|  | **0.00** | ----- |  |  |  |  |  |  |  |  |  |  |
|  |  |  |  |  |  |  |  |  |  |  |  |  |
| BUS T2 | **0.90** | **0.97** | 1.00 |  |  |  |  |  |  |  |  |  |
|  | 13.96 | 28.08 | ----- |  |  |  |  |  |  |  |  |  |
|  | **0.00** | **0.00** | ----- |  |  |  |  |  |  |  |  |  |
|  |  |  |  |  |  |  |  |  |  |  |  |  |
| BUS 5A | **0.03** | **0.02** | **0.05** | 1.00 |  |  |  |  |  |  |  |  |
|  | 0.20 | 0.14 | 0.35 | ----- |  |  |  |  |  |  |  |  |
|  | 0.84 | 0.89 | 0.73 | ----- |  |  |  |  |  |  |  |  |
|  |  |  |  |  |  |  |  |  |  |  |  |  |
| FIN T0 | **0.33** | **0.26** | **0.22** | **0.10** | 1.00 |  |  |  |  |  |  |  |
|  | 2.44 | 1.83 | 1.58 | 0.68 | ----- |  |  |  |  |  |  |  |
|  | **0.02** | **0.07** | 0.12 | 0.50 | ----- |  |  |  |  |  |  |  |
|  |  |  |  |  |  |  |  |  |  |  |  |  |
| FIN T1 | **0.48** | **0.46** | **0.49** | **0.21** | **0.59** | 1.00 |  |  |  |  |  |  |
|  | 3.81 | 3.57 | 3.90 | 1.48 | 5.07 | ----- |  |  |  |  |  |  |
|  | **0.00** | **0.00** | **0.00** | 0.15 | **0.00** | ----- |  |  |  |  |  |  |
|  |  |  |  |  |  |  |  |  |  |  |  |  |
| FIN T2 | **0.46** | **0.42** | **0.46** | **0.26** | **0.60** | 0.92 | 1.00 |  |  |  |  |  |
|  | 3.57 | 3.17 | 3.63 | 1.88 | 5.16 | 15.90 | ----- |  |  |  |  |  |
|  | **0.00** | **0.00** | **0.00** | **0.07** | **0.00** | **0.00** | ----- |  |  |  |  |  |
|  |  |  |  |  |  |  |  |  |  |  |  |  |
| FIN 5A | **-0.06** | **0.05** | **0.08** | **0.19** | **-0.12** | **-0.20** | **-0.22** | 1.00 |  |  |  |  |
|  | -0.44 | 0.33 | 0.54 | 1.36 | -0.83 | -1.39 | -1.54 | ----- |  |  |  |  |
|  | 0.66 | 0.74 | 0.59 | 0.18 | 0.41 | 0.17 | 0.13 | ----- |  |  |  |  |
|  |  |  |  |  |  |  |  |  |  |  |  |  |
| LAB T0 | **0.81** | **0.67** | **0.62** | **0.04** | **0.52** | **0.60** | **0.57** | **-0.05** | 1.00 |  |  |  |
|  | 9.74 | 6.28 | 5.54 | 0.29 | 4.24 | 5.16 | 4.79 | -0.35 | ----- |  |  |  |
|  | **0.00** | **0.00** | **0.00** | 0.78 | **0.00** | **0.00** | **0.00** | 0.73 | ----- |  |  |  |
|  |  |  |  |  |  |  |  |  |  |  |  |  |
| LAB T1 | **0.78** | **0.71** | **0.69** | **0.05** | **0.44** | **0.71** | **0.67** | **-0.06** | **0.90** | 1.00 |  |  |
|  | 8.68 | 6.99 | 6.65 | 0.33 | 3.41 | 6.92 | 6.23 | -0.44 | 14.72 | ----- |  |  |
|  | **0.00** | **0.00** | **0.00** | 0.74 | **0.00** | **0.00** | **0.00** | 0.66 | **0.00** | ----- |  |  |
|  |  |  |  |  |  |  |  |  |  |  |  |  |
| LAB T2 | **0.77** | **0.74** | **0.78** | **0.16** | **0.44** | **0.69** | **0.71** | **-0.02** | **0.77** | **0.87** | 1.00 |  |
|  | 8.36 | 7.60 | 8.67 | 1.15 | 3.36 | 6.54 | 6.98 | -0.14 | 8.41 | 12.21 | ----- |  |
|  | **0.00** | **0.00** | **0.00** | 0.25 | **0.00** | **0.00** | **0.00** | 0.89 | **0.00** | **0.00** | ----- |  |
|  |  |  |  |  |  |  |  |  |  |  |  |  |
| LAB 5A | **0.11** | **0.08** | **0.13** | **0.52** | **0.16** | **0.47** | **0.43** | **0.16** | **0.26** | **0.33** | **0.30** | 1.00 |
|  | 0.79 | 0.59 | 0.89 | 4.25 | 1.15 | 3.66 | 3.32 | 1.11 | 1.85 | 2.42 | 2.20 | ----- |
|  | 0.44 | 0.56 | 0.38 | **0.00** | 0.26 | **0.00** | **0.00** | 0.27 | **0.07** | **0.02** | **0.03** | ----- |

Factor Model Estimates: Factor Loadings– Full Sample

1. Benchmark

| Forecast horizon | Business | | Financial Analysts | | Trade unions | |
| --- | --- | --- | --- | --- | --- | --- |
|  | Full | Sub | Full | Sub | Full | Sub |
| T0 | 0.985 | 0.975 | 0.829 | 0.798 | 0.983 | 0.971 |
| T1 | 0.974 | 0.970 | 0.564 | 0.691 | 0.964 | 0.970 |
| T2 | 0.964 | 0.971 | 0.730 | 0.773 | 0.932 | 0.928 |
| 5a | 0.966 | NA | 0.928 | NA | 0.941 | NA |

1. Extended Model– Full Sample

| Forecast horizon | Business | Financial Analysts | Trade unions | SARB |
| --- | --- | --- | --- | --- |
|  | Full | Full | Full | Full |
| T0 | 0.965 | 0.893 | 0.966 | 0.898 |
| T1 | 0.934 | 0.683 | 0.927 | 0.595 |
| T2 | 0.952 | 0.785 | 0.924 | 0.485 |
| 5a | 0.959 | 0.928 | 0.953 | 0.856 |

Note: The Bai-Ng method is used to estimate factor models with the exception of the 5 year ahead horizon (sample: 2011Q3-2023Q4) which relies on the Ahn-Horenstein method. Estimates are based on principal factors (maximum likelihood yielded similar results). In all cases one cannot reject the null that there is a single factor. When a second factor is found its explanatory power was found to be very small (less than 15%). Results are available on request. Full is the full sample (2000Q2-2023Q4); Sub are the sub-sample estimates (2009Q2-2023Q4). NA means not applicable because differences between Full and Sub-sample are too small to impact estimates. Results for the extended model estimated for the sub-sample are almost the same as for the Full sample. Results not shown but are available on request.

Encompassing Tests: Full and Sub-samples

| Forecast horizon | BER vs BUS | | BER vs FIN | | BER vs TU | | BER vs SARB | |
| --- | --- | --- | --- | --- | --- | --- | --- | --- |
|  | Full | Sub | Full | Sub | Full | Sub | Full | Sub |
| T0 | .00 | .00 | .00 | .00 | .00 | .00 | .00 | .00 |
| T1 | .00 | .00 | .00 | .01 | .00 | .00 | .00 | .00 |
| T2 | .00 | .72 | .00 | .00 | .03 | .00 | .00 | .00 |
| 5a | .69 | .69 | .00 | .00 | .00 | .00 | .00 | .00 |

Multiple Forecasts Encompassing Tests

| Forecast horizon | BUS | | FIN | | TU | | SARB | |
| --- | --- | --- | --- | --- | --- | --- | --- | --- |
|  | Full | Sub | Full | Sub | Full | Sub | Full | Sub |
| T0 | .00 | .00 | .00 | .00 | .00 | .00 | .00 | .00 |
| T1 | .00 | .00 | .00 | .06 | .00 | .00 | .02 | .06 |
| T2 | .00 | .00 | .01 | .44 | .00 | .00 | .03 | .56 |
| 5a | .00 | .00 | .00 | NA | .00 | NA | .00 | NA |

Note: Values shown are p-values for the test of the statistical significance of the coefficient in the regression (i.e., H0.: ). BER is the BER forecast (average of BUS, FIN, and TU forecasts. *j*= BUS, FIN, TU, and SARB forecasts. *h* is the forecast horizon (T0, T1, T2, and 5a). NA means insufficient data for the sample in question. The Full sample is 2000Q2-2023Q4, and the sub-sample is 2009Q2-2023Q4. The multiple forecasts encompassing test regresses forecast errors from the sources shown (i.e., BUS, FIN, TU, and SARB) on forecast differences of the remaining forecasts. Accordingly, there are *k*=4 models estimated, and the Null hypothesis is whether the F-statistic with dependent variable , where *k*=BUS, FIN, TU, SARB is insignificant. P-values for the F-statistic are shown in the table.

1. **Selected Figures: Unless otherwise noted the Full sample is used (2000Q2-2023Q4; 2011Q3-2023Q4 for 5 years ahead forecasts)**

Evolution of sample sizes over time and across survey groups

Business Sector Survey Current Year Forecasts Across and Observed CPI Inflation

Note: CPIT0 is the current year forecast. Q75 and Q25 represent the 75th and and 25th quantiles of inflation forecasts. CPI_INFL is observed CPI inflation (100*log(CPIt – CPIt-4) or 100*log Pt). The shaded area is the SARB’s inflation target range (3-6%). BUS are data from the Business sector survey.

Business Sector Survey One Year Ahead Forecasts Across and Observed CPI Inflation

Business Sector Survey Two Years Ahead Forecasts Across and Observed CPI Inflation

Note: CPI(4) and CPI(8) are one and two years ahead observed inflation rates.

Business Sector Survey Five Years Ahead Forecasts Across and Observed CPI Inflation

Note: CPI5A_5YA is the five years ahead moving average of observed inflation.

Periods of Rising and Falling CPI Inflation

Note: Rising inflation is a positive change in annualized quarterly CPI Inflation; falling inflation is a zero or negative change in inflation.

Inflation Forecasts from the BER Survey Compared:
Business Versus Financial Analysts and Trade Unions

Note: BUS is the Business sector survey; FIN is the Financial Analysts survey; LAB is the Trade Union survey.

Forecasts Fixed Event Versus Fixed Horizon SARB Forecasts

Note: SARB are SARB inflation forecasts. CPIT0, CPIT1 and CPIT2 are current, one and two-year ahead horizons, respectively. *_FCASTS and *_FCASTSMI are, respectively, calendar year forecasts that come close to the forecast provided in the BER survey (i.e., fixed event forecasts) versus fixed horizon forecasts equivalents. See Siklos (2013) for the methodology and calculations details.

Five Years Ahead Forecasts Compared

Note: Bloomberg are 5 years ahead inflation forecasts implied by market interest rate futures. CPI5A_5YA is the five years moving average of future inflation. BUS, FIN and LAB are Business, Financial Analysts and Trade Union forecast surveys.

Forecast Errors from the BER Survey Compared

Note: FULL refers to the full sample (2000Q2-2023Q4) for T), T1, and T2 horizons, 2011Q3-2023Q4 for the 5 years ahead horizon. BUS, FIN, and LAB are explained in the previous Figure.

An Indicator of the Anchoring of Inflation Expectations

Note: constructed from individual level data as Mean ( where 4.5 is the midpoint of the SARB’s inflation target range and is expected inflation for horizon *h*= 0,1,2. The resulting series are labelled CRED. BUS, FIN, LAB, CPIT0, CPIT!, and CPIT2, are explained in previous Figures.

Observed inflation and Outliers in Business Sector Survey:
The Case of One-Year Ahead Forecasts

Note: An outlier is identified if two tests agree. They are: (1) thresholds defined by the distance from the mean such that the range if values a series can take that is not an outlier is: mσ. m is set to 2.7; (2) a wavelet outlier detection following Bilem and Huzurbazar (2002).

Selected Distribution Graphs

1. Business Sector Survey: One Year Ahead Forecast

1. Business Sector Survey: Five Year Ahead Moving Average Forecast

1. Financial Analysts: One Year Ahead Forecast

1. Financial Analysts: Five Year Ahead Moving Average Forecast

1. Trade Unions: One Year Ahead Forecasts

1. Trade Unions: Five Ahead Moving Average Forecast

Note: The data are based on annual averages of quarterly for the calendar years shown. The plot is the kernel density (Epanechnikov or parabolic kernel). The vertical dashed line indicates uses the BUSINESS sector survey as a benchmark. It is where the one year (T1) or average over five years ahead (5a) distributions are at their peak. For example, in the above figure for the trade union sector. The peak in the distribution (i.e., where inflation expectations responses are most frequent) is lower for the trade union sector than for the business sector. Stated differently, if we were to superimpose the distribution graph for the business sector, the peak in that distribution would be to the right of the one shown above. Comparing 2020 to 2022 the peak of the distribution has shifted to the right indicating rising average inflation expectations.

Root Mean Squared Errors Over Time – Selected Results

Note: BUSINESS is Business sector survey, FIN Analysts are the financial analysts, and LABOUR are the Trade Unions surveyed. T1, T1, T2, and 5a are the forecast horizons respondents are asked to provide forecasts for (T), T1, and T2 are calendar year forecasts, 5a are 5 years average forecasts).

Factor Model-Based Forecasts vs Aggregate Forecasts

Note: See Table XX for details about factor model estimates. T0, T1, T2, and 5a are the forecast horizons (h). CPI forecasts are for the mean of Business, Financial Analysts and Trade Union surveys.

How Does Adding Another Forecast Change Factor Model-Based Estimates?

Note: Factor model 1 consists of Business, Financial Analysts and Trade Union forecasts while Factor model 2 adds the market-derived 5 year ahead inflation forecasts. The sample is 2011Q3-2023Q4. Factor model estimation is explained in Table XX. Differences in factor model estimates adding SARB forecasts at other horizons (i.e., T0, T1, or T2) are extremely small (not shown but available on request).

Sub-Sample and Full Estimates of Factor Models Compared

Note: the sub-sample is defined as 2009Q2-2023Q4. 5 years ahead forecasts begin in 2011Q3 no sub-sample factor model estimates were generated for the long horizon forecasts.
